# Supplementary material for: The cytokines HGF and CXCL13 predict the severity and the mortality in COVID-19 patients
Source: PubMed Central journal article supplement (PMC8352963; doi:10.1038/s41467-021-25191-5), 2021-08-09
Supplement: 41467_2021_25191_MOESM3_ESM.pdf [file 41467_2021_25191_MOESM3_ESM.pdf]

## **Description of Additional Supplementary Files**

**Supplementary Data 1:** Contains detailed antibodies information of Panels 1-3 used in this study: isotope, marker, clone, provider, reference and dilution if relevant. Panel 1 was used to characterize circulating cell populations, Panel 2 for CD4 T cell lineage distribution and Panel 3 for CD4 T cell phospho-protein signaling profile.
